# Supplementary material for: Zds2p Regulates Swe1p-dependent Polarized Cell Growth in Saccharomyces cerevisiae via a Novel Cdc55p Interaction Domain
Source: PubMed Central journal article supplement — Mol Biol Cell. 2010 Dec 15;21(24):4373–86. doi: 10.1091/mbc.E10-04-0326 (PMC3002390; doi:10.1091/mbc.e10-04-0326), 2010-12-15
Supplement: E10-04-0326_1.pdf [file E10-04-0326_1.pdf]

**Supplemental Table 1.** Oligonucleotides used in this study

| Designation | Oligonucleotide                                                                                                                                    |
|-------------|----------------------------------------------------------------------------------------------------------------------------------------------------|
| oKK60       | <u>CGTATACTTTACATTGATCACGTTTGC</u> ACTATAGACTGAATTTAAATT<br><u>AGAATTTTAT</u> CGGATCCCCGGGTTAATTAA ( <i>ZDS2</i> flanking sequence<br>underlined)  |
| oKK62       | <u>GTGGCCTTATATAGGTATCTATCAATCTTG</u> TAAACAGTTATGAGTTAA<br><u>ATGTCTGGGAATTCGAGCTCGTTTAAAC</u> ( <i>ZDS2</i> flanking sequence<br>underlined)     |
| oKK135      | CGTGTCGTCAAGAGTGGTC                                                                                                                                |
| oKK148      | CAGTGGATCCAGCAGCTGTATAAGGAGTG (BamHI site underlined)                                                                                              |
| oKK149      | TAGT <u>GAGCTCG</u> CTGTATTGGACAGATCATT (SacI site underlined)                                                                                     |
| oKK205      | GAGTGATATCTATACTGTCG                                                                                                                               |
| oKK210      | ATCTCAACTTTGCCTCCAAG                                                                                                                               |
| oKK229      | GTACGAAGCTTATAATTATAATGCGGAAAAAATG (HindIII site<br>underlined)                                                                                    |
| oKK230      | AGTGCAGGAAGGATTT <u>CAGCACAAAACA</u> ATTTTGATTTTAAATTC<br>(XmnI site underlined)                                                                   |
| oKK247      | <u>TTCTACTTATTAAGATCAATAGGCACGTGCTATTTTC</u> GAACATCCACTT<br><u>TCAATATGGACATGGAGGCC</u> CAGAATACCC ( <i>RTS1</i> flanking sequence<br>underlined) |
| oKK248      | <u>TGGCATGCCCTAAACTTCTCACTTCTTCGAGCTTG</u> TAATGAATTGCTG<br><u>TTTCACTGCAGTATAGCGACCAGCATT</u> CAC ( <i>RTS1</i> flanking sequence<br>underlined)  |
| oKY6        | GCAAAGTTGAGACTTAAGGGGCAGTAGG                                                                                                                       |
| oKY7c       | CCTACTGCCCCCTAAGTCTCAACTTTG                                                                                                                        |
| oKY8        | GATTTGAGGGGCAGTAGGTC <u>GCGA</u> AGTGTTGTCTTCTCTC (NruI site<br>underlined)                                                                        |
| oKY9        | GAGAGAAGACAACACTT <u>CGCGAC</u> CTACTGCCCTCAAATC (NruI site<br>underlined)                                                                         |
| oKY12       | ACCACCATGGTACTGATGGAAGATATG (NcoI site underlined)                                                                                                 |
| oKY13       | TCTCTGCAGGTTCGAGGCCCTTATATAGGTATCTATC (PstI site underlined)                                                                                       |
| oKY20       | GAATTTTATGGTACTGATGGAAGATATGCAAACAAAGATGGCTGC<br><u>AGGTCGACAACCCTTAAT</u> (Underline indicates complement to 9x-myc<br>cassette of pOM22)         |
| oKY21       | GAGTGATATCTATACTGTCGTCGACATTAGTAGCATCGCCCTCTTCGC<br><u>GGCCGCATAGGCCACT</u> (Underline indicates complement to 9x-myc cassette<br>of pOM22)        |
| oKY31       | GGCTGCAAAATGGTCACATTG                                                                                                                              |
| oKY32       | CTTGTATTTCTCCTTCTTGTTG                                                                                                                             |
| oKY33b      | <u>C ATATCGAGGTCAA</u> ACTGGAGAGATCTTACGCATAAGAAATA<br><u>TAATATAGCGCACACGGATCCCCGGGTTAATTAA</u> ( <i>CDC55</i> flanking<br>sequence underlined)   |
| oKY34b      | <u>GTATGTGGGGAAGATATGGGATAAAAAA</u> AGTAAGGGAAAAT<br><u>AAGGAATTATTATAATGAATTCGAGCTCGTTTAAAC</u> ( <i>CDC55</i> flanking<br>sequence underlined)   |

oKY35 GGGAAAAC TAGTGTTTCTATA  
oKY49 CTGCAGCGAGGAGCCGTAAT  
oKY50 GAAGGGATCCATGGTACTGATGGAAGATATG (BamHI site underlined)  
oKY54 GAAGGGATCCATGTCCAATAGAGATAACG (BamHI site underlined)  
oKY55 GAAGACTAGTGTATATGTCTATGTATGCAGC (SpeI site underlined)  
oKY56 GAAGGGATCCCATATGCATAGCAACGTATTTG (BamHI site underlined)  
oKY76 GAAGAAGAAGAGCTCGGTTTCGATACTCTTTATTCGA (Sac I site  
underlined)  
oKY77 CGGATATATGCGGTGTGAAAT  
oKY83 ATGGGTCGCGGA TCCGTCATTGAACCAGAAGTGAGA (BamHI site  
underlined)  
oKY87 CGCAAGCTTGTCGACGAATTCGGCCTTATATAGGTATCTATC (Sall site  
underlined)  
oKY97 GGAGTTTGCACAAGACAAGACTATT  
oKY99 GTTTTGGTGAAGTGATGAAAGAAGT  
oKY100 ACCTCATAAAATCTAGCCAACATATCGAGGTCAAACCTGGAGA  
GATCTTACGGATCCCCGGGTTAATTAA (*CDC55* sequence underlined)  
oKY101 TTGAATTCAAGTTCAATTTAAATTTCAATTAACACAGTAGTAGT  
ATGTGGAATTCGAGCTCGTTTAAAC (*CDC55* sequence underlined)  
oKY103 CTCAGGCCACAAACAACCATGTCCA  
oKY106 CTTACCTGTCAATACCGTC  
oMR1 CACCTGCTCCATGTATAAG

# Supplemental Figure 1

```
Sc.Zds2 (808-913) SPTAPQIS-----TLPPRKLTFEDVVKP-----DYSNAF IKFTD S AFGFPLF MITNSTVIMFDHRLG INVERAIYRLSHLKLSD DGEEL RQQVLLSNFMYSYLNLVNHT-----LYMEQVG
Sc.Zds1 (795-902) FAAPPLKH-----TSILPPRKLTFADVKKP-----DKPNS EVQFTD S AFGFPLF LLTVSTVIMFDHRLP INVERAIYRLSHLKLNSK KGLRE QVLLSNFMYAYLNLVNHT-----LYMEQVA
S.pombe (753-842) SSSPPHNDAPPKAKPISAFSELPNITSVAAEAKCQ-----TVTDD EGT DQQ S DEKSTEFKTFIPDKDYYSFPICTERAIYRLSHLKLNSA HEP LFQQVLLSNFMYSYLDLISRIS-----SNRPMNNVQ
A.gossypii (877-992) HPSLDPGKSA L GFG EIAHSLPPRKLRFDDVLEP-----EKPN S FPKFT S AFGFPLF PLTVSTVIMFDHRLP IYVERAIYRLSHLKLSD KKEEL RQQVLLSNFMYSYLNLVNH S-----LYLQQIE
C.glabrata (719-817) DSSEKTSK-----KPLYPPRKLTFADVKKK-----DKANAF IEF TDS AFGFPLF ELTYSTVIMFDHRLP IHVERAIYRLSHLKLSDPKKVALRE QVLLSNFMYSYLNLVNHT-----LYMEQKS
K.lactis (815-920) QGTLEN-----QYFLPPRKLTFADVLEP-----DRPNS EMKFTD S AFGFPLF PLTISTVIMFDHRLP IHVERAIYRLSHLKLSDPKKVALRE QVLLSNFMYAYLNLVNH S-----LYLQQIE
Y.hypolitica (1234-1359) ESSDGYMDPAQQQPMYSFIDEALFDLPSTYMKFN-MMTVM DYETPIFYSGPAVLVFP GAGRAMVMYHFFELHIERAIYRLSHLKLANP RFP LFQQVLLSNFMYAYLDL INQYQQQQQMEAGAG
C.albicans (1454-1574) LATEQSVKFSQGEDLLSKNEDKEKLDIQEKLKKSIKRTSRANQIEEF TDS AFGFPLF PPSQSLVMLDYKFEVHVERAIYRLSHLKLANPKKSLRE QVLLSNFMYAYLNLVDHT-----LHLEQQN
```

## Supplemental Figure 2

\*

|                                     |                                                                                                                     |
|-------------------------------------|---------------------------------------------------------------------------------------------------------------------|
| <i>P.tricornutum</i> (485-527)      | F P L Q L K Q R T P I R V L H R R S N M I R V R H V L S A Q A H R I D . . . . . D H Y F R L . H I                   |
| <i>Z.mays</i> (35-79)               | K E M E I V Q K T P I R V L H R R S P L E R K R I I H W M E I E K I T G . . . . . S S N Y Y L L . H L               |
| <i>E.siliculosus</i> (498-540)      | E E L V V Q Q A T P I R V L H R R T L L D R P R S I F G M R A E W I N . . . . . E H F F Q L E L A                   |
| <i>S.niekkendorffii</i> (408-452)   | K E L E I Q Q K T P V R V L H R R S P L V R P R I I H W M R C E A L H D . . . . . S S C Y F L L . H L               |
| <i>H.sapiens</i> (436-478)          | K D L K I D Q K T P L R V L H R R P L A V R A R V I H F M E T Q Y V D . . . . . E H H F R L . H L                   |
| <i>A.thaliana</i> (415-458)         | K E L K I L Q K T P V R V L H R R S P L D R E K I I H W M K V E K I K G . . . . . H S H Y F L L . H L               |
| <i>A.mellifera</i> (338-394)        | Y V L K I I Q K T P I R V L H R R S L I N R E R K I F Q I K L I Y L H . . . . . K H F S L L . Y L                   |
| <i>P.falciparum</i> (485-527)       | K H L K I I Q K T P M R V L H R R P L S P R E R L I Y E M R A R W V K P Q E L K N L N I S S E D A N I F F I L . D I |
| <i>H.magnifapapillata</i> (167-209) | K N I V L M Q K T P I R V L H R R P L I T R E R T I Y E T N L T R V D . . . . . E F H Y D L . F I                   |
| <i>C.elegans</i> (365-407)          | I P L K I V Q K T P V R V M K R R A L L D R E R W I Y S M N F L K L D . . . . . D H H F E V . R L                   |
| <i>E.histolitica</i> (368-410)      | K D L L I Q Q K T P I R V L H R R S L L T R E R M I Y S L E L H P I D . . . . . G H F G L L . E L                   |
| <i>Sc Zds1</i> (836-878)            | F P L P L L T V S T V I M F D H R L P I N V E R A I Y R L S H L K L S . . . . . N S K R G L . R E                   |
| <i>Sc Zds2</i> (853-895)            | F P L P M I T N S T V I M F D H R L G I N V E R A I Y R L S H L K L S . . . . . D P G R E L . R Q                   |
| <i>S.pombe</i> (815-844)            | . . . . . Y W S R F P I C T E R A I Y R L S H I K L S . . . . . N A H R P L . F Q                                   |
| <i>C.neoformans</i> (578-620)       | A P P S P S P T S P N F Q N Y A R Y P I H V E R A V Y R L S H I K L A . . . . . N A R R P L . Y E                   |

## Supplemental Figure 3

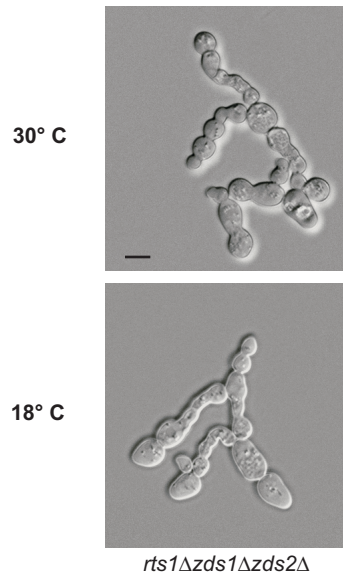

**Supplemental Figure 1.** Alignment of amino acid sequences with high homology to the ZH4 domain of Zds2p (residues 813-912) from representative fungal species (Accession numbers are as follow. *S. cerevisiae* Zds1 NP\_014000.1, *S. cerevisiae* Zds2 NP\_013598.1, *S. pombe* NP\_594632.1, *A. gossypii* NP\_982357.1, *C. glabrata* XP\_447996.1, *K. lactis* XP\_453144.1, *Y. lipolytica* XP505344.1, *C. albicans* XP\_717304.1). BLAST (Altschul *et al.*, 1990) was used to identify proteins that are homologous to Zds2p (813-912) and Tcoffee (Notredame *et al.*, 2000) alignment program was used to align the ZH4 domain. Asterisks mark the substituted amino acids (R863 and V868) in temperature-sensitive Zds2-3p. Dark blue shading indicates complete conservation of the residue whereas light blue shading indicates a semi-conserved residue.

**Supplemental Figure 2.** Alignment of amino acid sequences with some identity to a portion of the ZH4 domain of Zds2p (residues 853-895) from representative species (Accession numbers are as follow. *P. tricornutum* XP\_002179385.1, *Z. mays* NP\_001131786.1, *E. siliculosus* CBN75013.1, *S. moellendorffii* EFJ27746.1, *H. sapiens* NP\_653310.2, *A. thaliana* NP\_173466.2, *P. falciparum* XP\_001348196.1, *A. mellifera* XP\_001348196.1, *H. magnipapillata* XP\_002155895.1, *C. elegans* NP\_496819.1, *E. histolytica* XP\_655941.1, *S. cerevisiae* Zds1 NP\_014000.1, *S. cerevisiae* Zds2 NP\_013598.1, *S. pombe* NP\_594632.1, *C. neoformans* XP\_571315.1. BLAST (Altschul *et al.*, 1990) was used to identify proteins with sequence similarity and Tcoffee (Notredame *et al.*, 2000) alignment program was used to align the residues of Zds2p (853-895) found to have some identity across multiple Kingdoms. The residue marked with an asterisk denotes R863 in Zds2p and a conserved R in Pus10 family proteins in animals that is modeled to be involved in RNA binding (McCleverty *et al.*, 2007). Dark blue shading indicates a high degree of conservation whereas light blue shading indicates a semi-conserved residue.

**Supplemental Figure 3.** *zds1Δ zds2Δ* bud morphology defect does not require *RTS1*. Deletion of *RTS1* in a *zds1Δ zds2Δ* strain did not suppress the mutant, elongated bud phenotype at either 30°C or 18°C. DIC micrographs of representative log-phase *rts1Δ zds1Δ zds2Δ* (KKY1218) cells cultured at 18 or 30°C in rich medium (YPD) for 4h, after initial culturing at 30°C. Scale bar represents 5 microns.
